# Supplementary material
Source: bioRxiv or medRxiv preprint supplement (https://medrxiv.org/highwire/filestream/78167/field_highwire_adjunct_files/2/2020.04.21.20073916-3.pdf)
Supplement: Supplementary file [file 2020.04.21.20073916-3.pdf]

# Supplementary Appendix 3

## Unbiased average length of stay estimation - An illustrative example

### Contents

|                                                     |          |
|-----------------------------------------------------|----------|
| <b>1 Cohort simulation</b>                          | <b>1</b> |
| <b>2 ALOS estimation</b>                            | <b>4</b> |
| 2.1 Overall estimation . . . . .                    | 5        |
| 2.1.1 Estimation from discharged patients . . . . . | 5        |
| 2.1.2 Gamma distribution . . . . .                  | 5        |
| 2.1.3 Weibull distribution . . . . .                | 6        |
| 2.2 Stratified estimation . . . . .                 | 7        |
| 2.2.1 Estimation from discharged patients . . . . . | 7        |
| 2.2.2 Gamma distribution . . . . .                  | 7        |
| 2.2.3 Weibull distribution . . . . .                | 9        |

```
# Packages installation / loading
if (!require(pacman)) install.packages("pacman")

## Loading required package: pacman
pacman::p_load(tidyverse, latex2exp, flexsurv, knitr)
```

## 1 Cohort simulation

This first part aims at simulating a template of cohort data to apply our estimation method. If data is already available, you can skip this part.

Let us consider an hospital ward where patients are admitted on day  $day_{adm}$  and discharged on day  $day_{dis}$ . Patients can be admitted with a condition  $c_1$  and/or a condition  $c_2$ . To simulate a cohort of 120 patients admitted between days 0 and 30, we will assume their lengths of stay (LOS) follows a Weibull distribution depending on presence of  $c_1$  and  $c_2$ :

$$LOS_{c_1=0,c_2=0} \sim Weibull(\lambda = 12, k = 1.4)$$

$$LOS_{c_1=0,c_2=1} \sim Weibull(\lambda = 16, k = 1.4)$$

$$LOS_{c_1=1,c_2=0} \sim Weibull(\lambda = 18, k = 1.4)$$

$$LOS_{c_1=1,c_2=1} \sim Weibull(\lambda = 24, k = 1.4)$$

where  $\lambda$  and  $k$  are the scale and shape parameters, respectively.

These parameters are chosen so that the expected LOS depends on  $c_1$  and  $c_2$  with no interaction ( $\frac{24}{12} = \frac{16}{12} \times \frac{18}{12}$ ).

```
ggplot(data.frame(days = c(0, 40)), aes(days)) +
  stat_function(fun = function(x) dweibull(x, scale = 12, shape = 1.4),
              aes(color = "No", linetype = "No")) +
```

```

stat_function(fun = function(x) dweibull(x, scale = 16, shape = 1.4),
             aes(color = "No", linetype = "Yes")) +
stat_function(fun = function(x) dweibull(x, scale = 18, shape = 1.4),
             aes(color = "Yes", linetype = "No")) +
stat_function(fun = function(x) dweibull(x, scale = 24, shape = 1.4),
             aes(color = "Yes", linetype = "Yes")) +
scale_color_manual(TeX("Condition c_1"), values=c("cadetblue", "coral3")) +
scale_linetype_manual(TeX("Condition c_2"), values=c("dashed", "solid")) +
labs(title = TeX("Simulated lengths of stay depending on conditions c_1 and/or c_2"),
     y = "Density") +
theme_light() +
theme(legend.position = "bottom")

```

Simulated lengths of stay depending on conditions  $c_1$  and/or  $c_2$

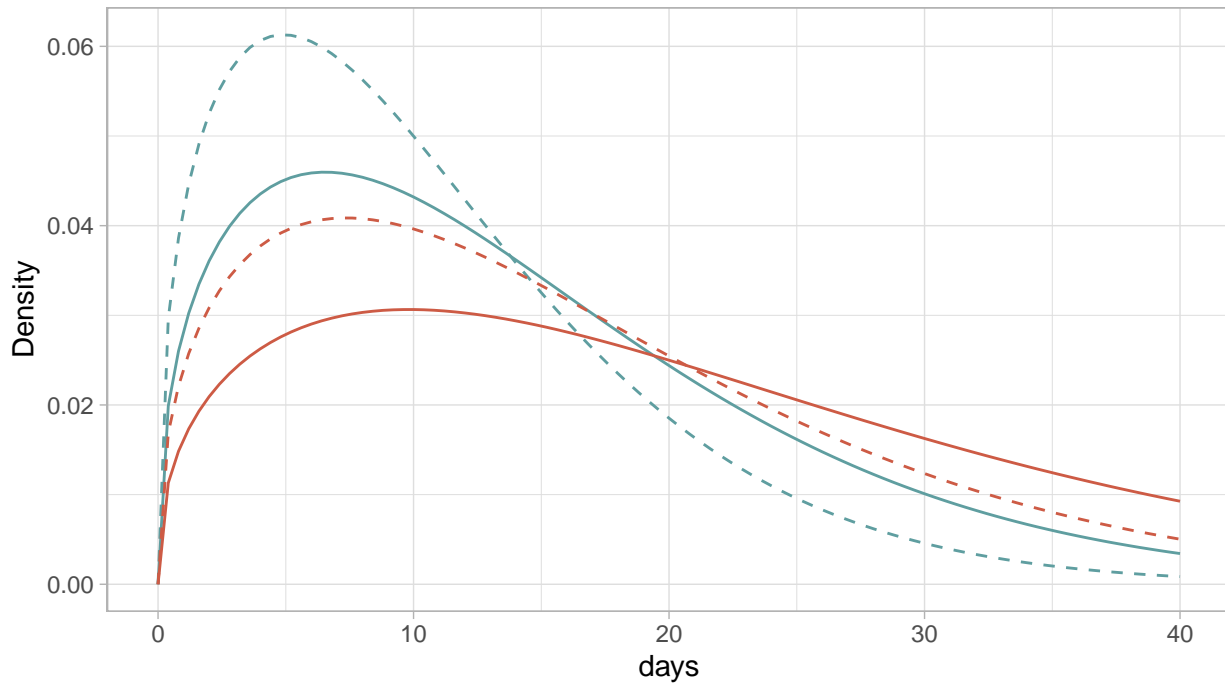

Condition  $c_1$  — No — Yes    Condition  $c_2$  - - No — Yes

The expected LOS would then be:

$$E(LOS_{c_1=0, c_2=0}) = 10.94 \text{ days}$$

$$E(LOS_{c_1=0, c_2=1}) = 14.58 \text{ days}$$

$$E(LOS_{c_1=1, c_2=0}) = 16.41 \text{ days}$$

$$E(LOS_{c_1=1, c_2=1}) = 21.87 \text{ days}$$

Assuming 40% and 30% independent prevalences of Conditions  $c_1$  and  $c_2$ , the overall expected length of stay would be:

$$E(LOS) = 16.75 \text{ days}$$

```
ggplot(data.frame(days = c(0, 40)), aes(days)) +
  stat_function(fun = function(x) dweibull(x, scale = 15.84, shape = 1.4),
              color = "black", linetype = "solid") +
  labs(title = TeX("Simulated lengths of stay in the cohort"), y = "Density") +
  theme_light()
```

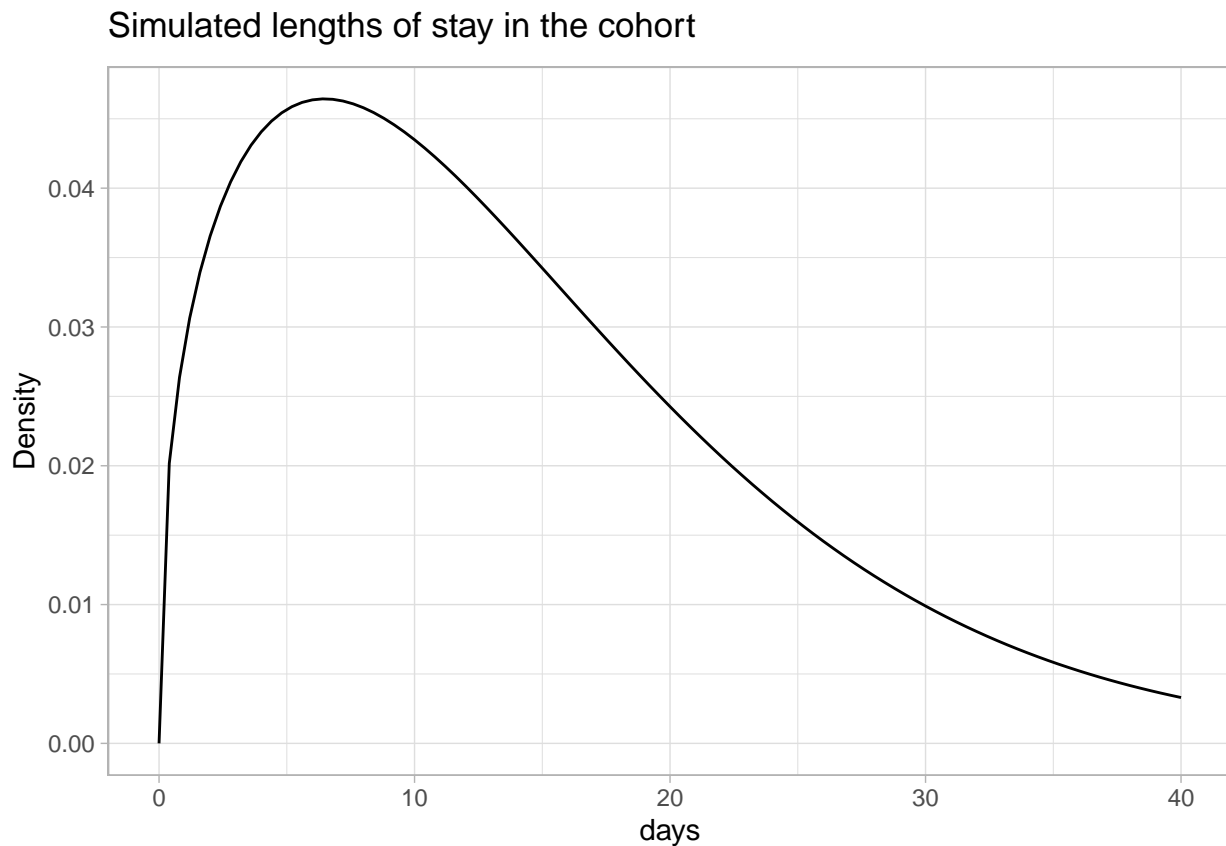

At the end of follow-up, collected data should look like these:

```
n_patients <- 120

set.seed(123)

cohort <- tibble(
  c1 = rbinom(n_patients, 1, .4),
  c2 = rbinom(n_patients, 1, .3),
  day_adm = sample(0:30, n_patients, replace = TRUE),
  los = rweibull(n_patients, shape = 1.4,
                scale = 12 ^ (!c1 & !c2) * 16 ^ (!c1 & c2) * 18 ^ (c1 & !c2) * 24 ^ (c1 & c2)),
  day_dis = day_adm + los
)
```

Sample of cohort data

```
head(cohort, 10) %>% kable()
```

| c1 | c2 | day_adm | los       | day_dis  |
|----|----|---------|-----------|----------|
| 0  | 0  | 28      | 2.463783  | 30.46378 |
| 1  | 0  | 13      | 20.225422 | 33.22542 |
| 0  | 0  | 20      | 12.107165 | 32.10716 |
| 1  | 0  | 15      | 6.560676  | 21.56068 |
| 1  | 0  | 22      | 25.663693 | 47.66369 |
| 0  | 1  | 28      | 43.302964 | 71.30296 |
| 0  | 0  | 0       | 11.129225 | 11.12923 |
| 1  | 0  | 7       | 14.339551 | 21.33955 |
| 0  | 0  | 7       | 10.802316 | 17.80232 |
| 0  | 0  | 9       | 12.599069 | 21.59907 |

where `c1` and `c2` describe the presence of conditions  $c_1$  and  $c_2$ , `day_adm` the admission day, `los` the length of stay and `day_dis` the discharge day.

After the last patient is discharged (day 82 after the first admission), we can retrospectively estimate the average length of stay (ALOS):

```
mean(cohort$los)
```

```
## [1] 14.25218
```

And depending on  $c_1$  and  $c_2$  strata:

```
cohort %>%  
  group_by(c1, c2) %>%  
  summarise(n = n(), ALOS = mean(los)) %>%  
  kable()
```

| c1 | c2 | n  | ALOS     |
|----|----|----|----------|
| 0  | 0  | 52 | 11.57320 |
| 0  | 1  | 20 | 14.02546 |
| 1  | 0  | 39 | 16.41435 |
| 1  | 1  | 9  | 20.86515 |

Note that these estimates may be bad approximations of the true distribution of simulated LOS, especially in low-sample-size strata.

## 2 ALOS estimation

Now let us assume we need to estimate ALOS early in the follow-up, without waiting until the last patient is discharged (e.g. on day 25).

On this day, only a subset of patients is known and only some of them are discharged. Let us keep only patients admitted before day 25 and add:

- a dummy variable `discharged` when these patients are already discharged,
- a variable `obs_los` for the observed LOS, defined as the real LOS for discharged patients and the time since admission for patients not discharged yet.

```

day_obs <- 25

cohort_sub <- cohort %>%
  filter(day_adm < day_obs) %>%
  mutate(
    discharged = ifelse (day_dis < day_obs, 1, 0),
    obs_los = ifelse(discharged == 1, los, day_obs - day_adm)
  )

```

## 2.1 Overall estimation

### 2.1.1 Estimation from discharged patients

A biased ALOS estimation would consider only discharged patients and underestimate the true ALOS:

```

cohort_sub %>%
  filter(discharged == 1) %>%
  summarise(mean(los)) %>%
  kable()

```

|           |
|-----------|
| mean(los) |
| 8.750394  |

We advise to rather fit a parametric model accounting for censored data, using for example gamma or Weibull distributions (the generalized gamma distribution is even more flexible but requires a larger sample size to provide accurate estimates).

### 2.1.2 Gamma distribution

```

fit_gamma <- flexsurvreg(Surv(obs_los, discharged) ~ 1, data = cohort_sub, dist = "gamma")
fit_gamma

```

```

## Call:
## flexsurvreg(formula = Surv(obs_los, discharged) ~ 1, data = cohort_sub,
##   dist = "gamma")
##
## Estimates:
##      est    L95%    U95%    se
## shape 1.6684 1.1836 2.3517 0.2922
## rate  0.1170 0.0716 0.1910 0.0293
##
## N = 90, Events: 42, Censored: 48
## Total time at risk: 714.5166
## Log-likelihood = -157.2152, df = 2
## AIC = 318.4304

```

This model allows us to estimate the ALOS and its 95% confidence interval in the cohort:

```
summary(fit_gamma, type = "mean", tidy = TRUE) %>%  
  kable()
```

|  | est      | lcl      | ucl     |
|--|----------|----------|---------|
|  | 14.26194 | 11.22449 | 18.3244 |

Parametric estimates of the median LOS are also available:

```
summary(fit_gamma, type = "quantile", quantiles = .5, tidy = TRUE) %>%  
  kable()
```

| quantile | est      | lcl      | ucl      |
|----------|----------|----------|----------|
| 0.5      | 11.53561 | 9.294747 | 14.49314 |

### 2.1.3 Weibull distribution

The Weibull distribution usually provides similar results.

```
fit_weibull <- flexsurvreg(Surv(obs_los, discharged) ~ 1, data = cohort_sub, dist = "weibull")  
fit_weibull
```

```
## Call:  
## flexsurvreg(formula = Surv(obs_los, discharged) ~ 1, data = cohort_sub,  
##   dist = "weibull")  
##  
## Estimates:  
##      est    L95%    U95%    se  
## shape  1.521   1.194   1.937  0.188  
## scale  14.801  12.066  18.157  1.543  
##  
## N = 90,  Events: 42,  Censored: 48  
## Total time at risk: 714.5166  
## Log-likelihood = -156.1922, df = 2  
## AIC = 316.3844
```

```
summary(fit_weibull, type = "mean", tidy = TRUE) %>%  
  kable()
```

|  | est      | lcl      | ucl     |
|--|----------|----------|---------|
|  | 13.34015 | 10.74001 | 16.7032 |

```
summary(fit_weibull, type = "quantile", quantiles = .5, tidy = TRUE) %>%  
  kable()
```

| quantile | est      | lcl      | ucl      |
|----------|----------|----------|----------|
| 0.5      | 11.63182 | 9.578722 | 14.08484 |

## 2.2 Stratified estimation

Sometimes predictions may be needed for patients with different characteristics from those used to fit the model (e.g. if data used to estimate ALOS were collected in another ward).

### 2.2.1 Estimation from discharged patients

In our example, estimating ALOS in discharged patients with conditions  $c_1$  and/or  $c_2$  would still provide unreliable estimates and we would have to wait even longer to reach a sample size large enough to get approximately correct estimates in all strata:

```
cohort_sub %>%
  filter(discharged == 1) %>%
  group_by(c1, c2) %>%
  summarise(mean(los)) %>%
  kable()
```

| c1 | c2 | mean(los) |
|----|----|-----------|
| 0  | 0  | 7.821280  |
| 0  | 1  | 8.188997  |
| 1  | 0  | 10.170456 |
| 1  | 1  | 11.479803 |

Parametric estimation of ALOS can account for available characteristics of patients as covariates in a multivariable model.

### 2.2.2 Gamma distribution

```
fit_gamma2 <- flexsurvreg(Surv(obs_los, discharged) ~ c1 + c2, data = cohort_sub, dist = "gamma")
fit_gamma2
```

```
## Call:
## flexsurvreg(formula = Surv(obs_los, discharged) ~ c1 + c2, data = cohort_sub,
##   dist = "gamma")
##
## Estimates:
##      data mean  est    L95%    U95%    se    exp(est)  L95%
## shape      NA   1.7826  1.2606  2.5208  0.3151     NA      NA
## rate       NA   0.1664  0.1000  0.2768  0.0432     NA      NA
## c1         0.4111 -0.5196 -0.9737 -0.0655  0.2317  0.5948  0.3777
## c2         0.2333 -0.2337 -0.7544  0.2870  0.2657  0.7916  0.4703
##          U95%
## shape      NA
```

```
## rate      NA
## c1      0.9366
## c2      1.3324
##
## N = 90, Events: 42, Censored: 48
## Total time at risk: 714.5166
## Log-likelihood = -154.282, df = 4
## AIC = 316.564
```

Strata-specific predictions can be obtained from a table with expected patients characteristics:

```
new_patients <- tibble(
  c1 = c(0, 0, 1, 1),
  c2 = c(0, 1, 0, 1)
)

new_patients %>%
  kable()
```

| c1 | c2 |
|----|----|
| 0  | 0  |
| 0  | 1  |
| 1  | 0  |
| 1  | 1  |

```
summary(fit_gamma2, newdata = as.data.frame(new_patients), type = "mean", tidy = TRUE) %>%
  kable
```

|  | est      | lcl       | ucl      | c1 | c2 |
|--|----------|-----------|----------|----|----|
|  | 10.71355 | 7.953683  | 14.11880 | 0  | 0  |
|  | 13.53374 | 8.220933  | 22.68118 | 0  | 1  |
|  | 18.01330 | 11.913356 | 26.52203 | 1  | 0  |
|  | 22.75506 | 13.165916 | 40.22275 | 1  | 1  |

```
summary(fit_gamma2, newdata = new_patients, type = "quantile", quantiles = .5, tidy = TRUE) %>%
  kable
```

| quantile | est       | lcl       | ucl      | c1 | c2 |
|----------|-----------|-----------|----------|----|----|
| 0.5      | 8.790397  | 6.477792  | 11.61714 | 0  | 0  |
| 0.5      | 11.104349 | 6.920743  | 17.63102 | 0  | 1  |
| 0.5      | 14.779799 | 10.080274 | 21.72277 | 1  | 0  |
| 0.5      | 18.670380 | 10.884376 | 32.34239 | 1  | 1  |



### 2.2.3 Weibull distribution

```
fit_weibull2 <- flexsurvreg(Surv(obs_los, discharged) ~ c1 + c2, data = cohort_sub, dist = "weibull")
fit_weibull2
```

```
## Call:
## flexsurvreg(formula = Surv(obs_los, discharged) ~ c1 + c2, data = cohort_sub,
##   dist = "weibull")
##
## Estimates:
##      data mean  est      L95%    U95%    se      exp(est)  L95%
## shape      NA   1.6107  1.2624  2.0551  0.2002      NA      NA
## scale      NA  11.2938  8.7727 14.5395  1.4556      NA      NA
## c1      0.4111  0.4681  0.0656  0.8706  0.2054  1.5969  1.0678
## c2      0.2333  0.2542 -0.2036  0.7121  0.2336  1.2895  0.8158
##      U95%
## shape      NA
## scale      NA
## c1      2.3883
## c2      2.0382
##
## N = 90,  Events: 42,  Censored: 48
## Total time at risk: 714.5166
## Log-likelihood = -152.9372, df = 4
## AIC = 313.8744
```

```
summary(fit_weibull2, newdata = new_patients, type = "mean", tidy = TRUE) %>%
  kable
```

|  | est      | lcl       | ucl      | c1 | c2 |
|--|----------|-----------|----------|----|----|
|  | 10.11962 | 7.952574  | 13.12852 | 0  | 0  |
|  | 13.04912 | 8.501720  | 20.43688 | 0  | 1  |
|  | 16.16021 | 11.557616 | 23.57332 | 1  | 0  |
|  | 20.83838 | 12.624316 | 35.45040 | 1  | 1  |

```
summary(fit_weibull2, newdata = new_patients, type = "quantile", quantiles = .5, tidy = TRUE) %>%
  kable
```

| quantile | est       | lcl       | ucl      | c1 | c2 |
|----------|-----------|-----------|----------|----|----|
| 0.5      | 8.995397  | 6.915231  | 11.48800 | 0  | 0  |
| 0.5      | 11.599448 | 7.573293  | 17.83245 | 0  | 1  |
| 0.5      | 14.364919 | 10.341230 | 19.75012 | 1  | 0  |
| 0.5      | 18.523376 | 11.123776 | 28.64298 | 1  | 1  |
